# Supplementary material for: Anion receptors with nitrone C–H hydrogen bond donors
Source: Royal Society of Chemistry journal article supplement (doi:10.1039/d3cc00371j), 2023-01-01
Supplement: d3cc00371j1.pdf [file d3cc00371j1.pdf]

# Supplementary Information

## Anion Receptors with Nitron C-H Hydrogen Bond Donors

Xuxian He, Richard R. Thompson, Sarah A. Clawson, Frank R. Fronczek, Semin Lee\*

Department of Chemistry, Louisiana State University  
Baton Rouge LA 70803, USA

Email of the corresponding author: [seminlee@lsu.edu](mailto:seminlee@lsu.edu)

- S.1 General Methods**
- S.2 Synthesis and Characterization of Compounds**
- S.3 NMR Spectra of Compounds**
- S.4 Determining Anion Association Constant Using <sup>1</sup>H NMR Titration**
- S.5 Computational Studies of Dinitrone 3**
- S.6 X-ray Crystallographic Analysis of Dinitrone 3**
- S.7 References**

## S.1 General methods

All commercially available reagents and solvents were used without purification.  $^1\text{H}$  NMR (400 MHz and 500 MHz) and  $^{13}\text{C}$  NMR (100 MHz and 125 MHz) were recorded on a Bruker AVIII-400 MHz Nanobay and Bruker AVIII 500 MHz at rt (298 K). Chemical shifts ( $\delta$ ) were referenced to tetramethylsilane (TMS) or residual solvent peaks, chloroform (7.26 ppm for  $^1\text{H}$  NMR, 77.16 ppm for  $^{13}\text{C}$  NMR), acetone- $d_6$  (2.05 ppm for  $^1\text{H}$  NMR, 29.84 ppm for  $^{13}\text{C}$  NMR), DMSO- $d_6$  (2.50 ppm for  $^1\text{H}$  NMR, 39.52 ppm for  $^{13}\text{C}$  NMR), acetonitrile- $d_3$  (1.94 ppm for  $^1\text{H}$  NMR, 1.32 ppm for  $^{13}\text{C}$  NMR). High resolution electrospray ionization (ESI) mass spectrometry was performed on Agilent 6230 TOF LC/MS. Column chromatography was performed on the Biotage Isolera One system. Empty flash cartridge housing from Luknova were filled and packed with Silicycle F60 silica gel (40 – 63  $\mu\text{m}$ , 60  $\text{\AA}$ ) for column chromatography purifications.

## S.2 Synthesis and Characterization of Compounds

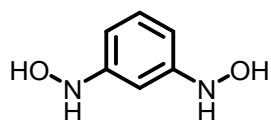

**2**

***m*-Phenylenedihydroxylamine (2)**: Synthesized by following a reported procedure using Rh/C.<sup>1</sup> To a mixture of 1,3-dinitrobenzene (0.15 g, 0.89 mmol) and rhodium 5% on carbon (Rh/C) (11 mg, 0.0054 mmol Rh, 0.006 equivalents) in THF (3 mL) was slowly added hydrazine monohydrate (0.107 g, 2.14 mmol, 2.4 equiv.) and stirred at 0 °C under N<sub>2</sub> atmosphere for 1 hour. The reaction was monitored by TLC. The reaction mixture was filtered through Celite to remove the residue of Rh/C. The filtrate was dried using a rotary evaporator and then high vacuum to provide a yellow-brown solid (0.107g 0.76 mmol, 86%) without further purification.  $^1\text{H}$  NMR (400 MHz, Acetone- $d_6$ ):  $\delta$  = 7.57 (s, 2H), 7.51 (s, 2H), 6.99 (t,  $J$  = 8 Hz, 1H), 6.66 (t,  $J$  = 2 Hz, 1H), 6.43 (dd,  $J$  = 8, 2 Hz, 2H).  $^{13}\text{C}$  NMR

(125 MHz, Acetone- $d_6$ ):  $\delta = 153.5, 129.3, 106.7, 99.9$ . ESI:  $C_6H_9N_2O_2$   $[M+H]^+$  calcd 141.06585, found 141.06581.

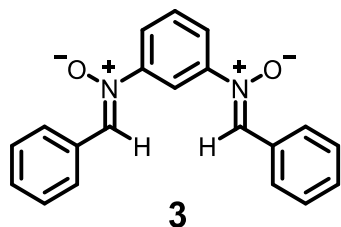

**Dinitrone 3:** Dihydroxylamine **2** (0.107 g, 0.77 mmol) and benzaldehyde (0.406 g, 3.83 mmol, 5 equiv) were dissolved with 5 mL ethanol in a vial. The reaction mixture was stirred at room temperature under  $N_2$  atmosphere overnight. The milky suspension

was generated next day. 10 mL hexane was added to the milky suspension and then sonicated for 15 minutes. The mixture was filtered using a membrane filter and thoroughly washed with hexane (5 mL  $\times$  3). The solid mixture was collected and transferred to a vial and dried completely under high vacuum to provide a light yellow solid product (90 mg, 0.28 mmol, 36%).  $^1H$  NMR (400 MHz, DMSO- $d_6$ ):  $\delta = 8.66$  (s, 2H), 8.52-8.50 (m, 5H), 8.09 (dd,  $J = 8, 2$  Hz, 2H), 7.74 (t,  $J = 8, 1.03$ H), 7.55-7.51 (m, 6H).  $^{13}C$  NMR (125 MHz, DMSO- $d_6$ ):  $\delta = 148.7, 134.2, 130.9, 130.9, 129.9, 129.0, 128.5, 122.8, 115.1$ . ESI:  $C_{20}H_{17}N_2O_2$   $[M+H]^+$  calcd 317.12845, found 317.12842.

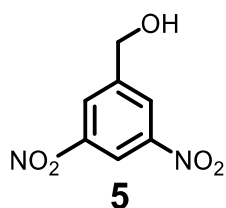

3,5-Dinitrobenzyl alcohol (**5**) was prepared from 3,5-Dinitrobenzoic acid following the published method.<sup>2</sup> The  $^1H$  NMR and  $^{13}C$  NMR spectra matched that of the published results.<sup>2</sup>

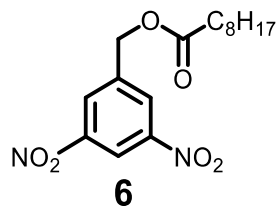

**Compound 6:** A solution of nonanoic acid (1.64 g, 11.4 mmol, 1.5 equiv.) and thionyl chloride (5.4 g, 45.4 mmol, 6 equiv.) in chloroform (8 mL) was stirred at 70  $^\circ C$  for 6 hours. Chloroform and excess thionyl chloride were removed by distillation to give nonanoyl chloride, which was used in the next step without

further purification. To a solution of compound **5** (1.5 g, 7.57 mmol) and triethyl amine (4.2 mL, 30 mmol, 4 equiv.) in DCM (50 mL) was dropwise added nonanoyl chloride (11.4 mmol) at 0 °C. The reaction was warmed to room temperature and stirred under nitrogen atmosphere for 16 hours. The reaction was quenched with water. The reaction mixture was extracted with DCM (3 × 50 mL) and the organic phase was washed with brine (1 × 50 mL). The organic phase was collected and dried with MgSO<sub>4</sub>, filtered and dried by rotary evaporation. The crude mixture was purified by column chromatography (SiO<sub>2</sub>, hexane:ethyl acetate 10:1) yielding the product as a light yellow solid (2.25 g, 6.66 mmol, 88%). <sup>1</sup>H NMR (400 MHz CDCl<sub>3</sub>): δ = 9.00 (t, *J* = 2 Hz, 1H), 8.54 (d, *J* = 2 Hz, 2H), 5.30 (s, 2H), 2.44 (t, *J* = 8 Hz, 2H), 1.71-1.64 (m, 2H), 1.35-1.27 (m, 10H), 0.87 (t, *J* = 8, 3H). <sup>13</sup>C NMR (125 MHz, CDCl<sub>3</sub>): δ = 173.2, 148.7, 141.0, 127.8, 118.4, 63.7, 34.1, 31.8, 29.25, 29.18, 29.16, 24.9, 22.7, 14.1. ESI: C<sub>16</sub>H<sub>22</sub>N<sub>2</sub>O<sub>6</sub> [M]<sup>-</sup> calcd 338.14834, found 338.14695.

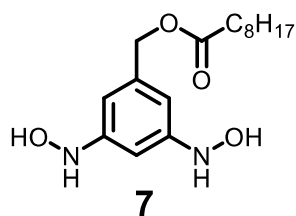

**Dihydroxylamine 7:** To a mixture of compound **6** (0.3 g, 0.89 mmol) and rhodium 5% on carbon (Rh/C) (18 mg, 0.0089 mmol, 0.01 equiv.) in THF (3 mL) was slowly added hydrazine monohydrate (0.11 mL, 2.2 mmol, 2.5 equiv.) and stirred at 0 °C under nitrogen atmosphere for 1 hour. The reaction was monitored by TLC. The reaction mixture was filtered through Celite. The filtrate was dried using a rotary evaporator, followed by high vacuum to provide **7** as a yellow solid (0.26g 0.84 mmol, 94%). <sup>1</sup>H NMR (400 MHz, Acetone-*d*<sub>6</sub>): δ = 7.63 (s, 2H), 7.59 (s, 2H), 6.61 (s, 1H), 6.45 (s, 2H), 4.97 (s, 2H), 2.33 (t, *J* = 8 Hz, 2H), 1.64-1.58 (m, 2H), 1.34-1.27 (m, 10H), 0.87 (t, *J* = 4 Hz, 3H). <sup>13</sup>C NMR (125 MHz Acetone-*d*<sub>6</sub>): δ = 173.6, 153.5, 138.0, 106.1, 99.3, 66.7, 34.6, 32.5, 29.9, 29.8, 29.8, 25.6, 23.2, 14.3. ESI: C<sub>16</sub>H<sub>26</sub>N<sub>2</sub>O<sub>4</sub> [M+H]<sup>+</sup> calcd 311.19653, found 311.19631.

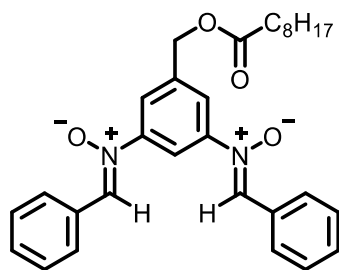

**8**

**Dinitrone 8:** Dihydroxylamine **7** (0.088 g, 0.28 mmol) and benzaldehyde (0.14 mL, 1.42 mmol, 5 equiv.) were dissolved with 2 mL ethanol in a vial. The reaction mixture was stirred at room temperature under nitrogen atmosphere overnight. The solvent was removed by rotary evaporation. The crude mixture was purified by

column chromatography (SiO<sub>2</sub>, hexane:ethyl acetate 2.5:1) yielding the product as blown sticky oil (76 mg, 0.16 mmol, 57%). <sup>1</sup>H NMR (400 MHz Acetone-*d*<sub>6</sub>): δ = 8.56-8.54 (m, 4H), 8.52 (s, 2H), 8.43 (s, 1H), 8.10 (s, 2H), 7.51-7.50 (m, 6H), 5.29 (s, 2H), 2.43 (t, *J* = 8 Hz, 2H), 1.67-1.61 (m, 2H), 1.35-1.25 (m, 10H), 0.85 (t, *J* = 4 Hz, 3.00H). <sup>13</sup>C NMR (125 MHz Acetone-*d*<sub>6</sub>): δ = 173.5, 150.4, 140.3, 134.7, 132.2, 131.6, 129.9, 129.3, 122.7, 115.3, 65.1, 34.5, 32.5, 30.0 (overlap with the solvent peak), 29.9, 29.8, 25.6, 23.3, 14.3. ESI: C<sub>20</sub>H<sub>34</sub>N<sub>2</sub>O<sub>4</sub> [M+H]<sup>+</sup> calcd 487.25913, found 487.25850.

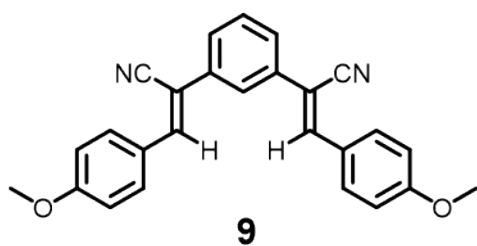

**9**

Dicyanostilbene (**9**) was prepared from the condensation between *p*-Anisaldehyde and 1,3-Phenylenediacetonitrile following the published method.<sup>3</sup> The <sup>1</sup>H NMR and <sup>13</sup>C NMR spectra matched that of the published results.<sup>3</sup>

### S.3 NMR Spectra of Compounds

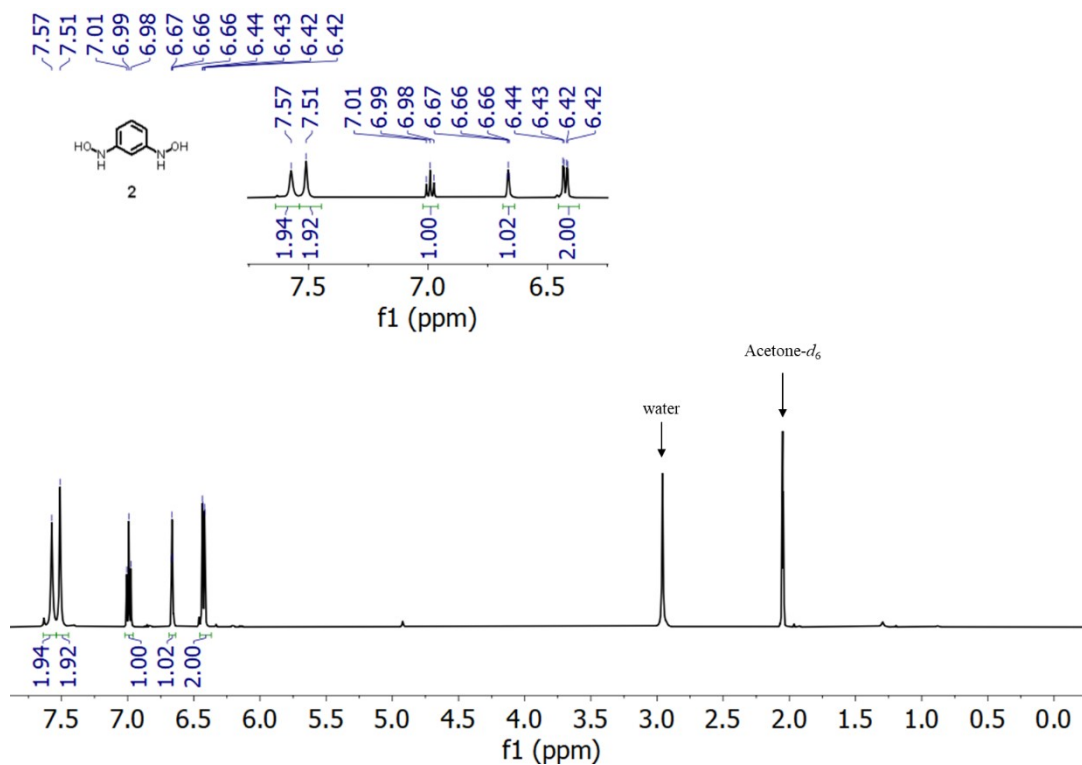

Figure S1. <sup>1</sup>H NMR spectrum of **2** (400 MHz, Acetone-*d*<sub>6</sub>).

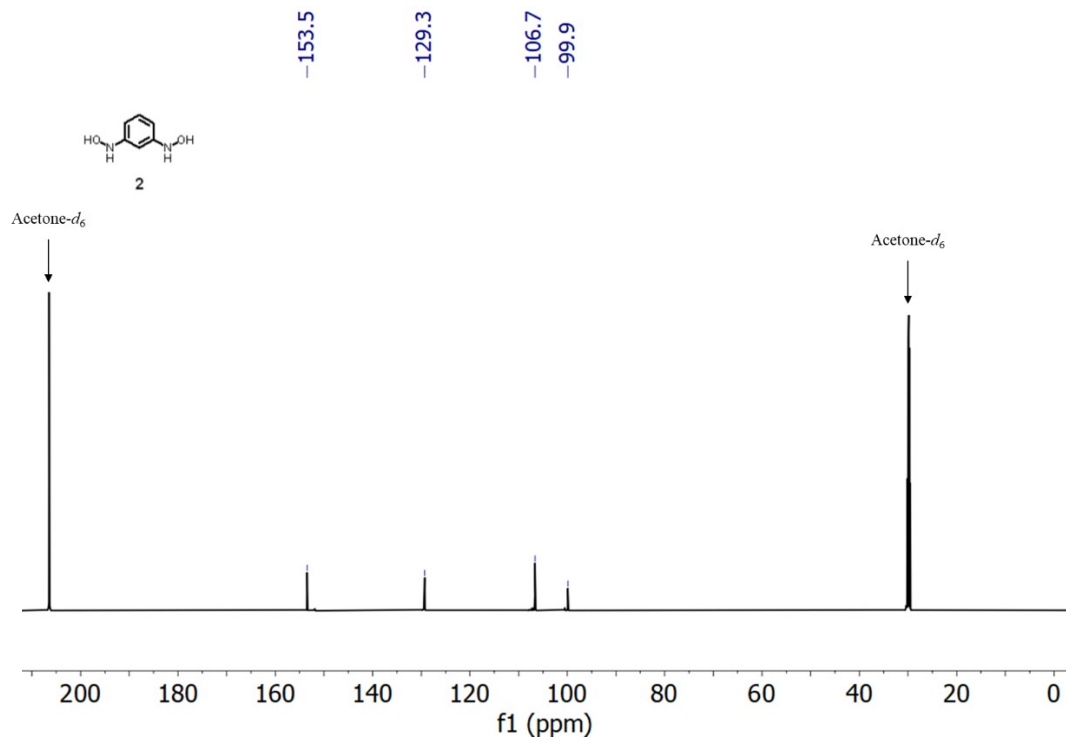

Figure S2. <sup>13</sup>C NMR spectrum of **2** (125 MHz, Acetone-*d*<sub>6</sub>).

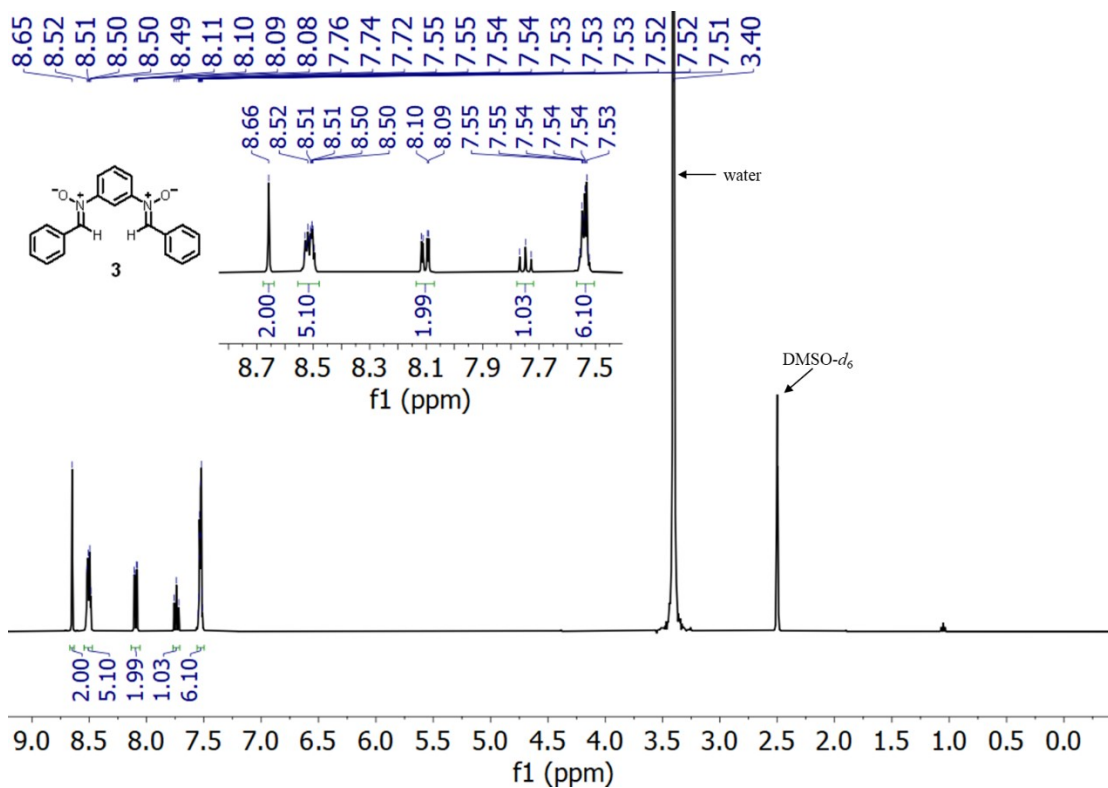

**Figure S3.**  $^1\text{H}$  NMR spectrum of **3** (400 MHz,  $\text{DMSO-}d_6$ ).

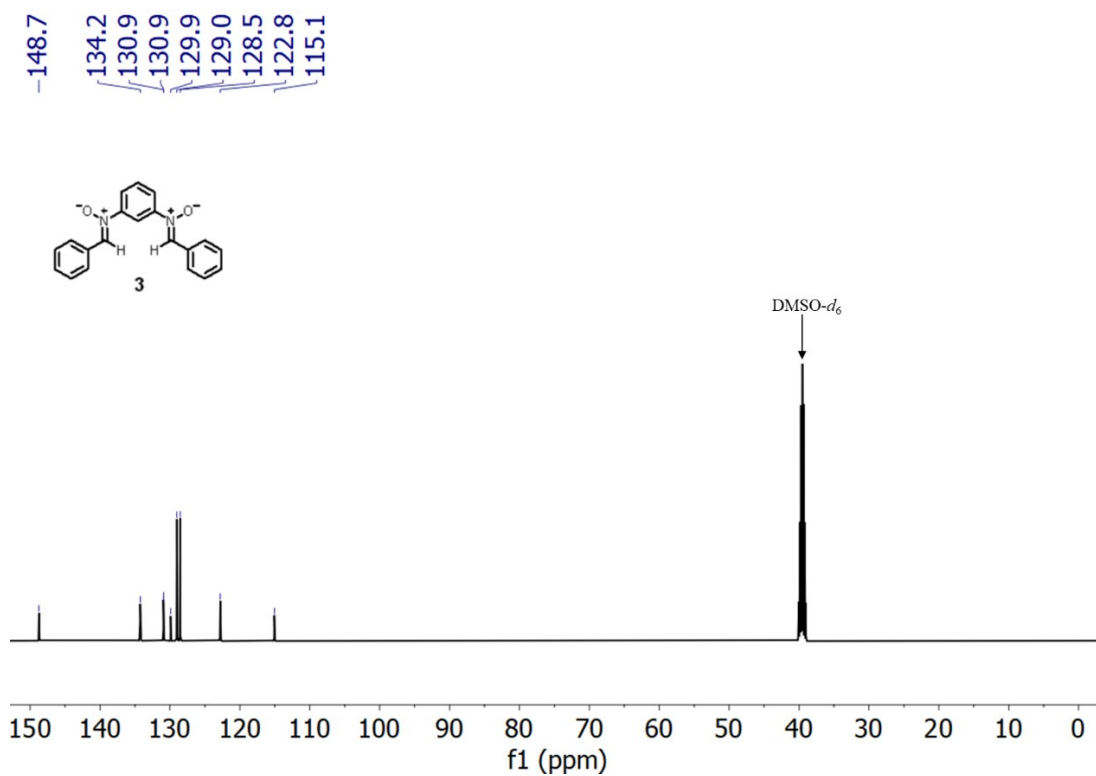

**Figure S4.**  $^{13}\text{C}$  NMR spectrum of **3** (125 MHz,  $\text{DMSO-}d_6$ ).

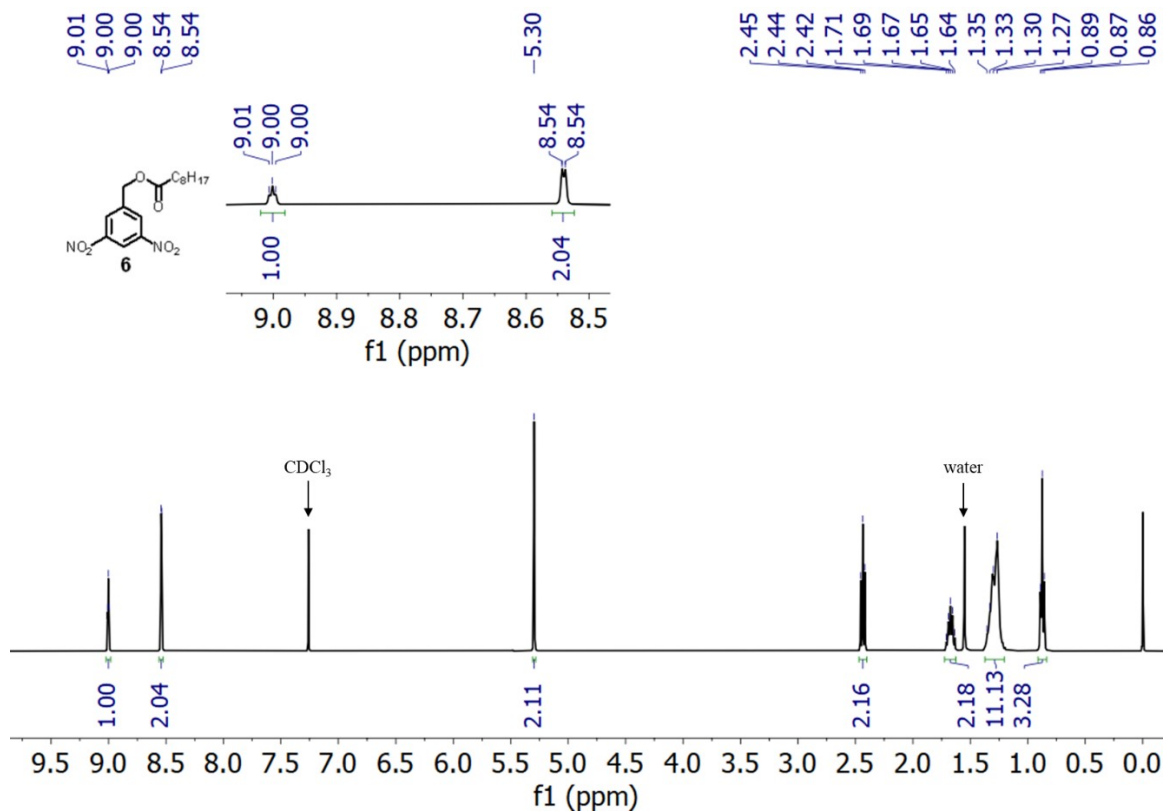

**Figure S5.** <sup>1</sup>H NMR spectrum of **6** (400 MHz, CDCl<sub>3</sub>).

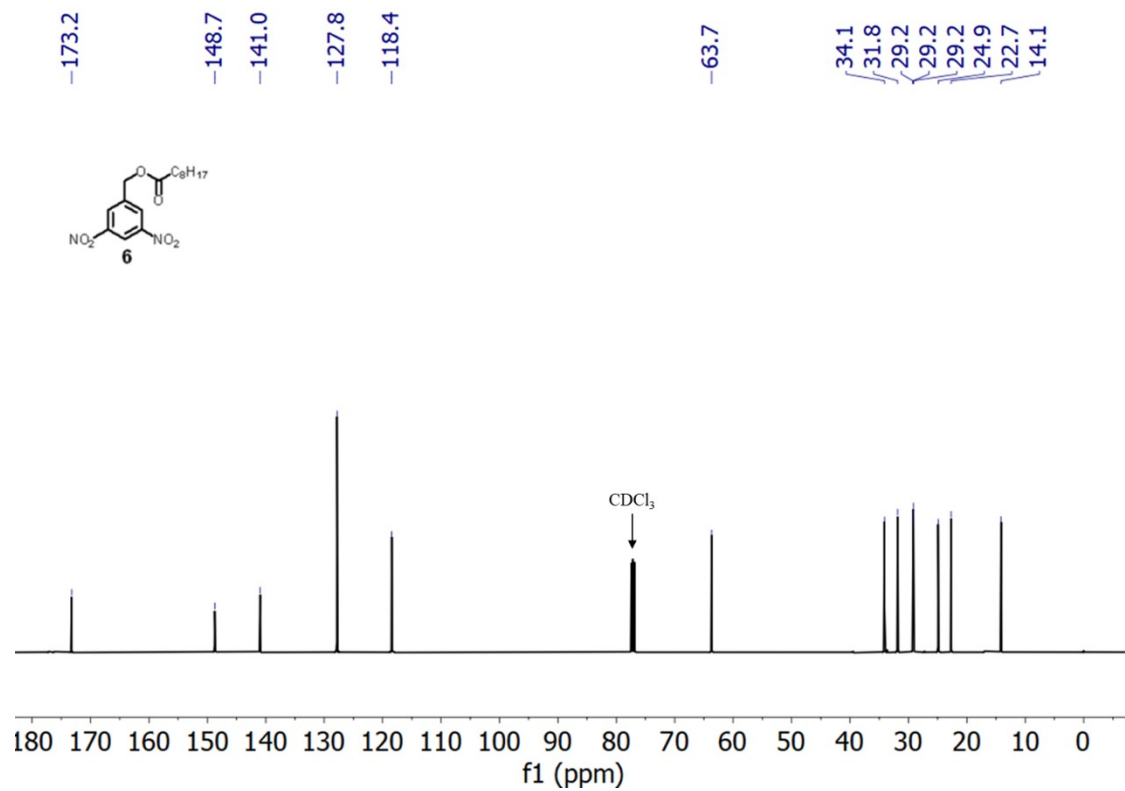

**Figure S6.** <sup>13</sup>C NMR spectrum of **6** (125 MHz, CDCl<sub>3</sub>).



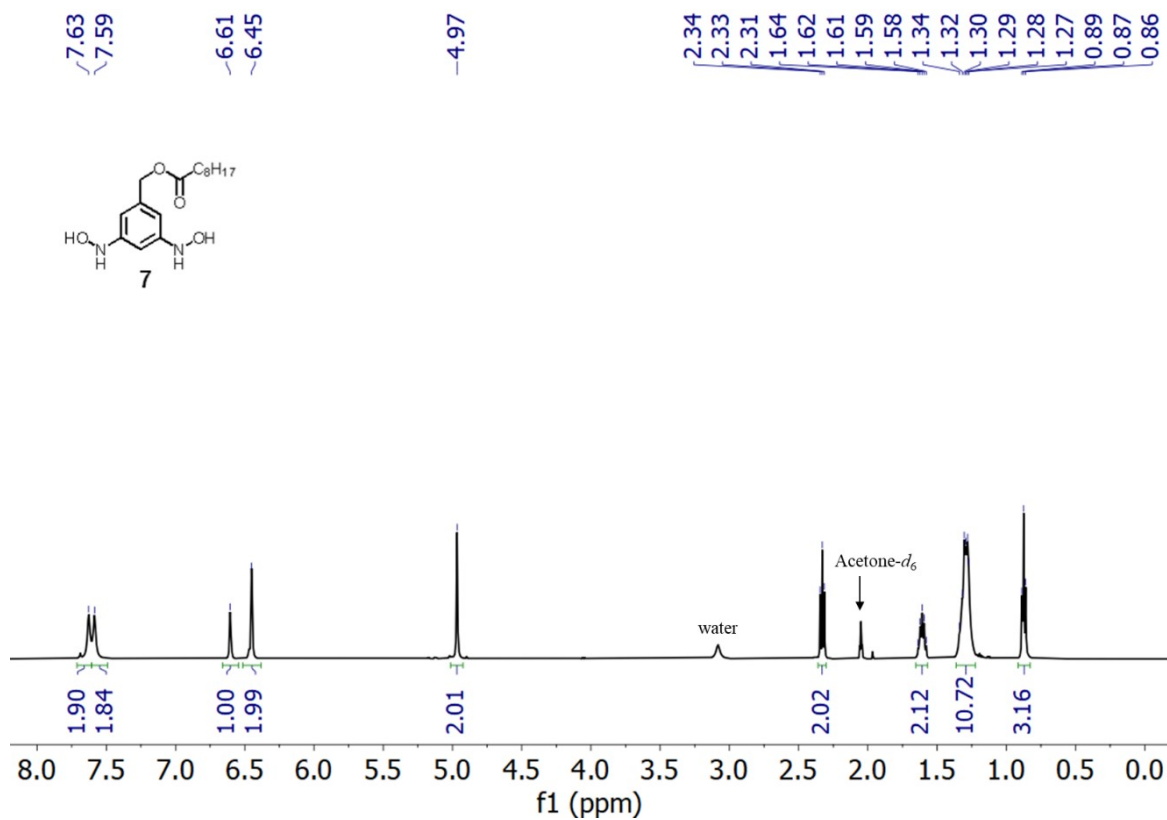

**Figure S7.** <sup>1</sup>H NMR spectrum of **7** (400 MHz, Acetone-*d*<sub>6</sub>).

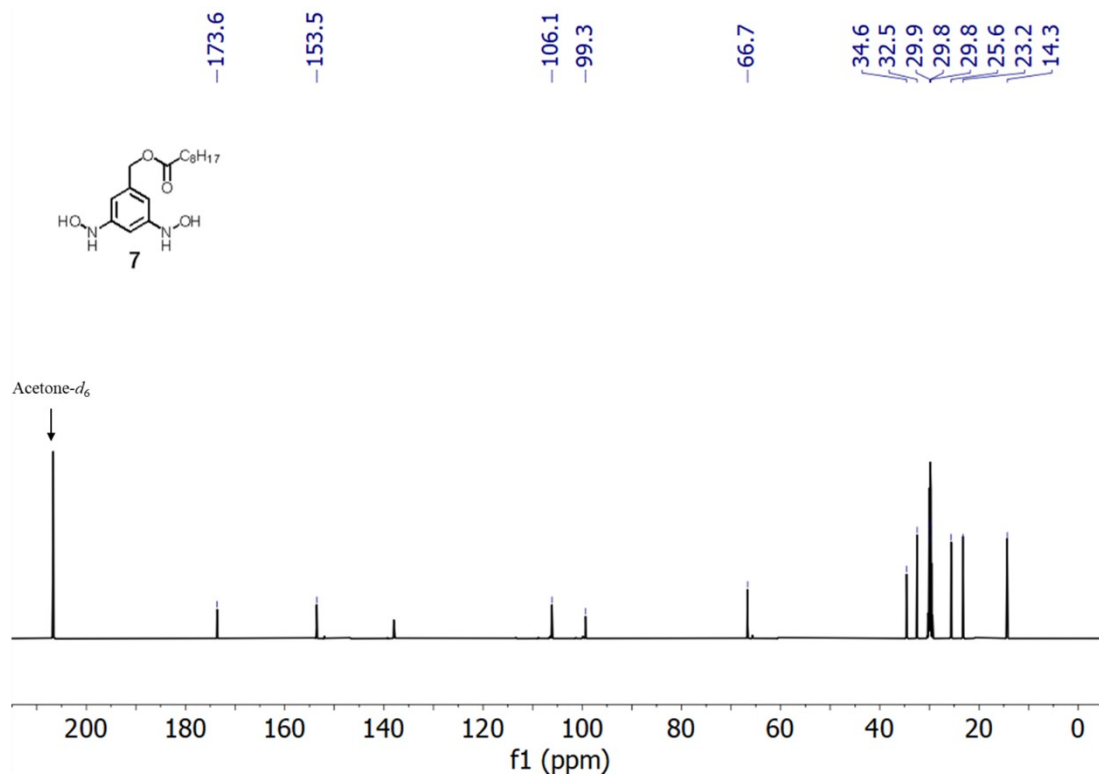

**Figure S8.** <sup>13</sup>C NMR spectrum of **7** (125 MHz, Acetone-*d*<sub>6</sub>).

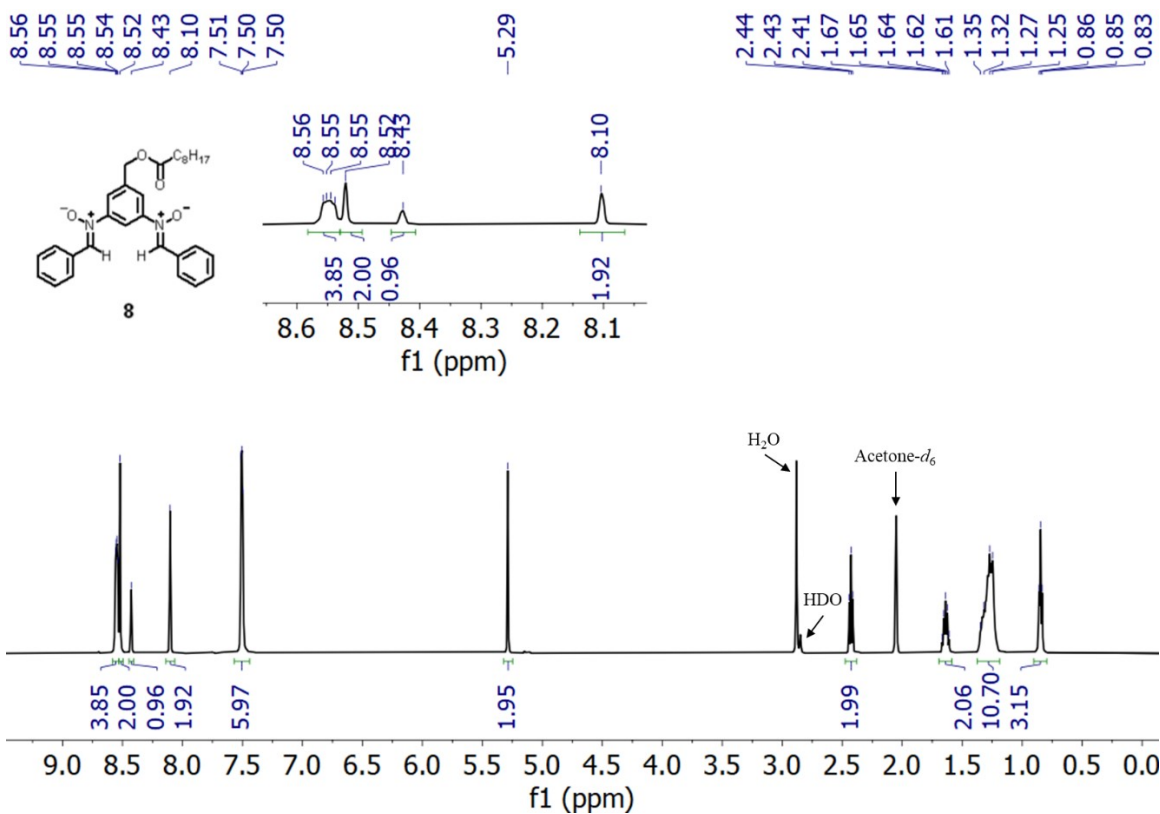

**Figure S9.** <sup>1</sup>H NMR spectrum of **8** (400 MHz, Acetone-*d*<sub>6</sub>).

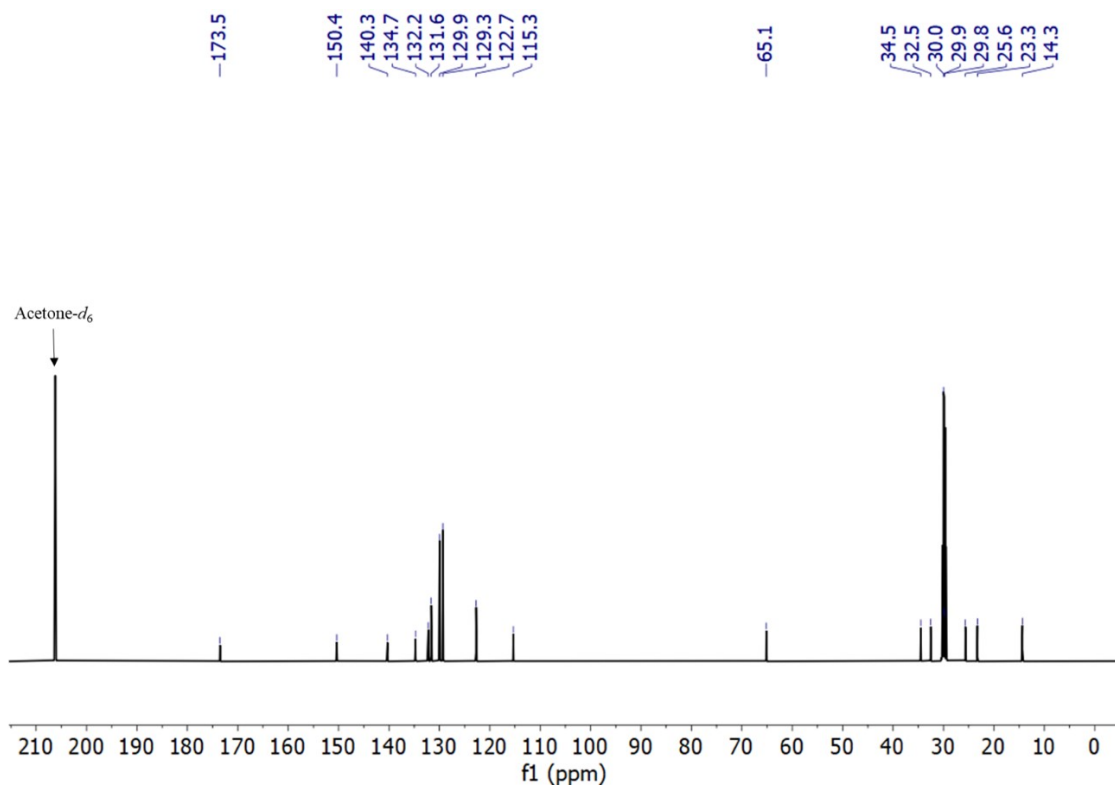

**Figure S10.** <sup>13</sup>C NMR spectrum of **8** (125 MHz, Acetone-*d*<sub>6</sub>).

## S.4 Determining Anion Association Constant Using $^1\text{H}$ NMR Titration

A solution of dinitrone **8** in acetone- $d_6$  (5 mM, 0.5 mL) was loaded into an NMR tube capped with silicone/PTFE septum. Increasing equivalents of tetrabutylammonium chloride (TBACl), tetrabutylammonium bromide (TBABr) and tetrabutylammonium iodide (TBAI) were added as a concentrated solution (250 mM). Spectra were recorded after each addition.

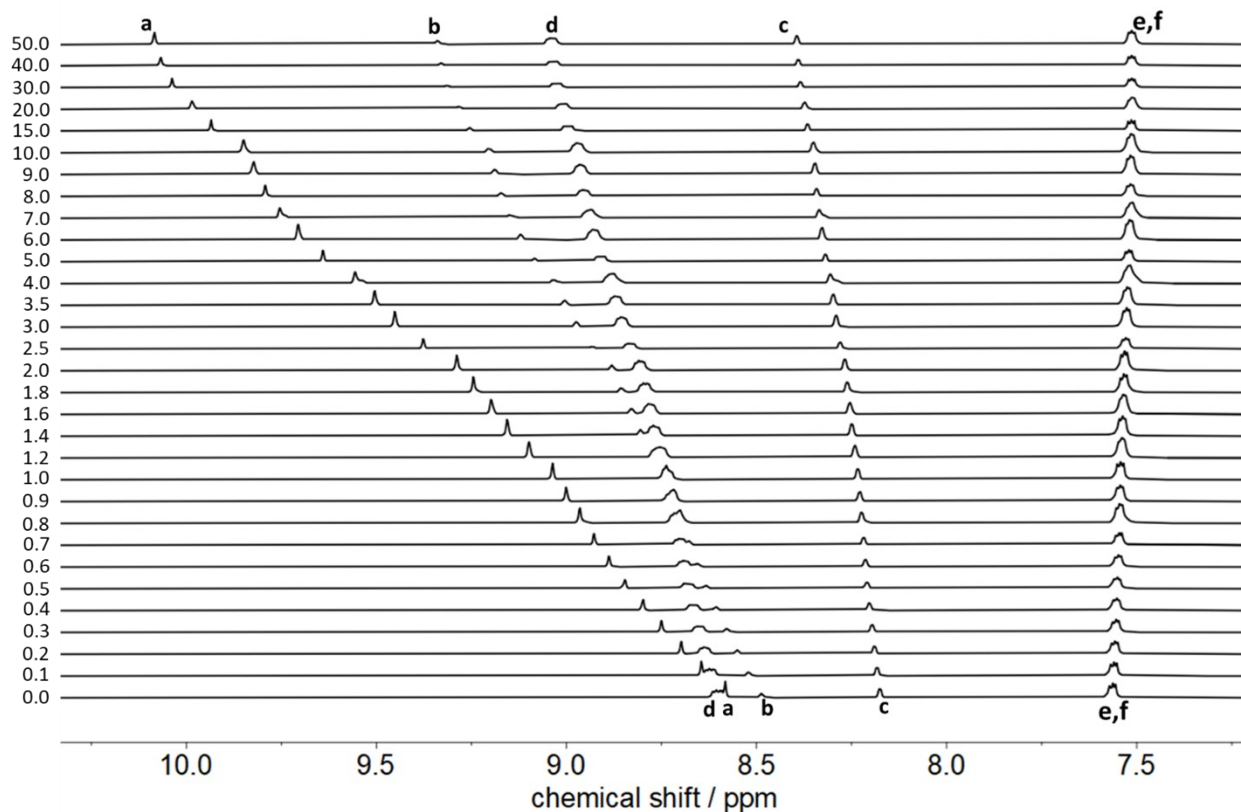

**Figure S11.**  $^1\text{H}$  NMR titration of dinitrone **8** with TBACl (5 mM Acetone- $d_6$ , 298 K)

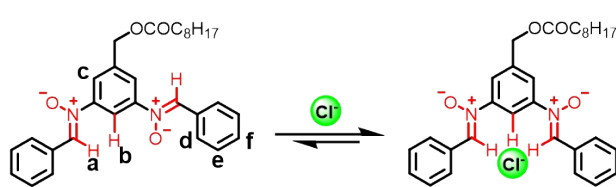

| Parameters                 |                         |                   |                             |
|----------------------------|-------------------------|-------------------|-----------------------------|
| Parameter (bounds)         | Optimised               | Error             | Initial                     |
| $K (0 \rightarrow \infty)$ | $107.16 \text{ M}^{-1}$ | $\pm 1.9341$<br>% | $100.00$<br>$\text{M}^{-1}$ |

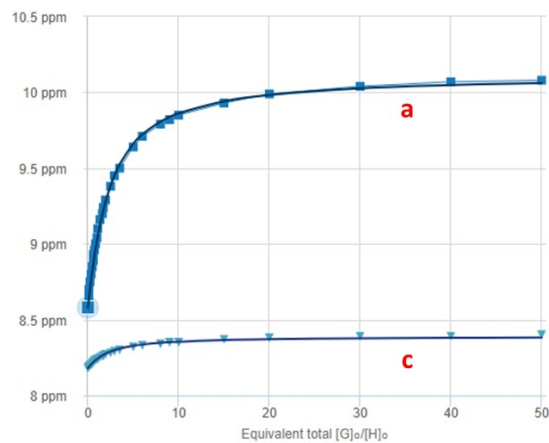

**Figure S12.** Result of data fitting of dinitrone **8** for proton  $\text{H}^a$  and  $\text{H}^c$  using online Bindfit platform

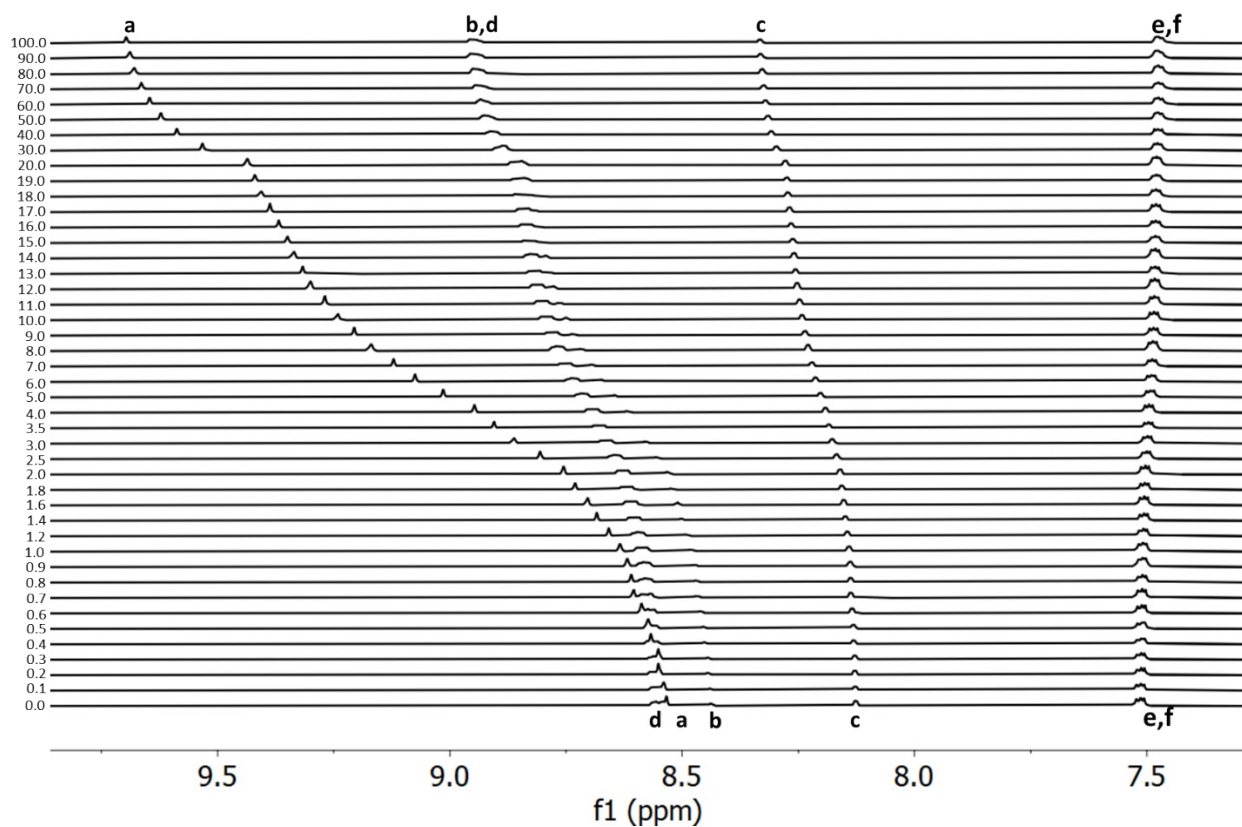

**Figure S13.**  $^1\text{H}$  NMR titration of dinitrone **8** (5 mM Acetone- $d_6$ , 298 K) with TBABr.

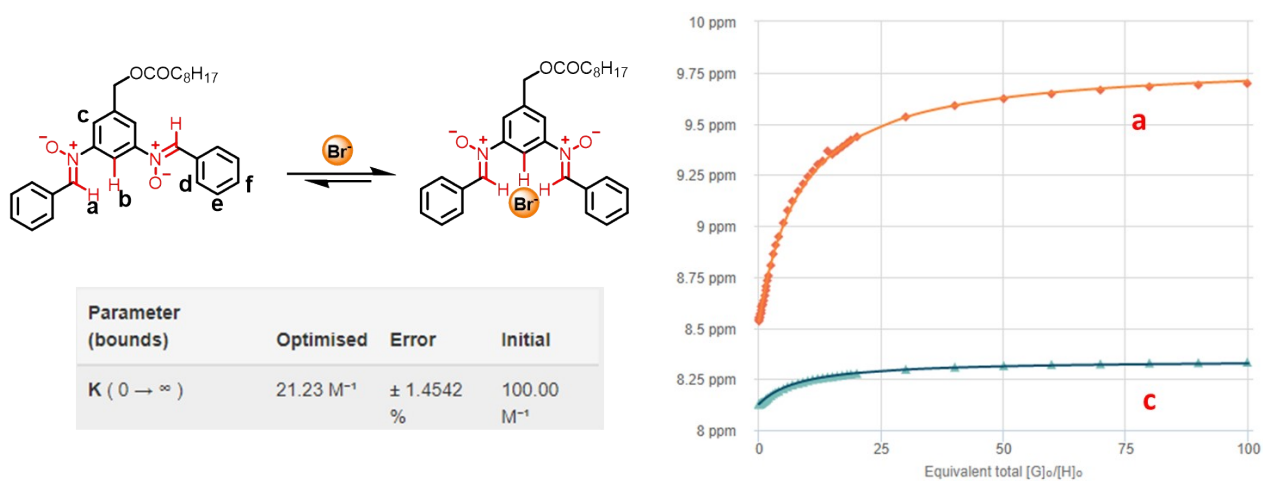

**Figure S14.** Result of data fitting of dinitrone **8** for proton  $\text{H}^a$  and  $\text{H}^c$  using online Bindfit platform

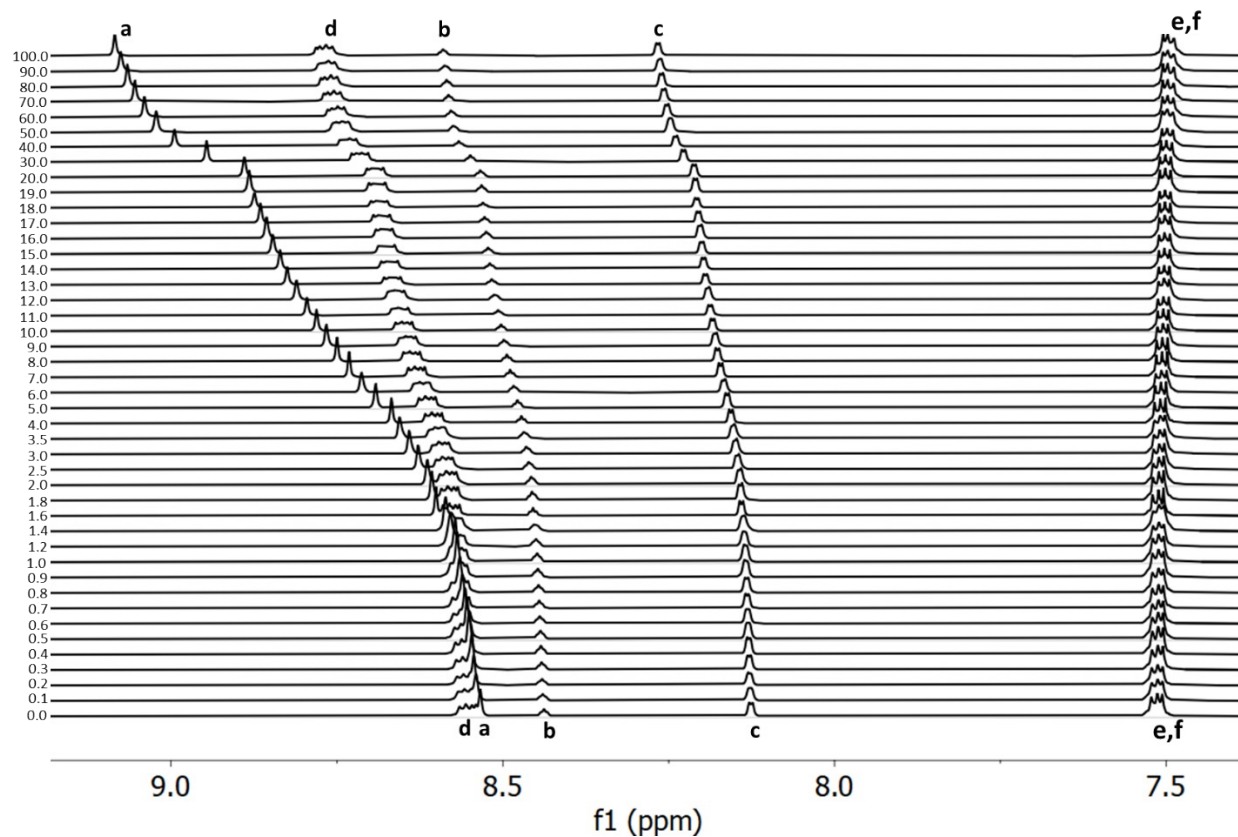

**Figure S15.**  $^1\text{H}$  NMR titration of dinitrone **8** with TBAI (5 mM Acetone- $d_6$ , 298 K)

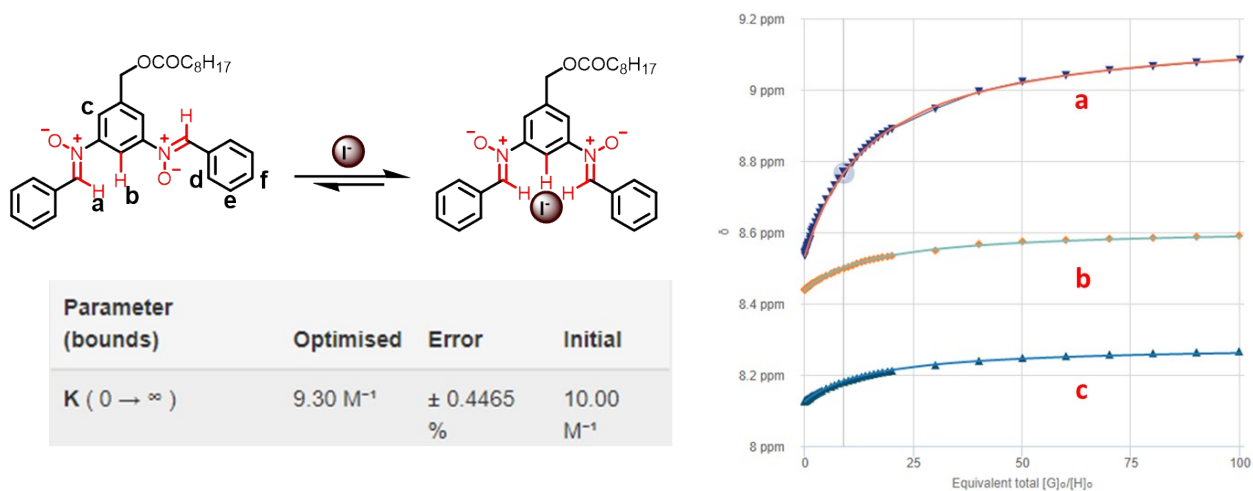

**Figure S16.** Result of data fitting of dinitrone **8** for proton  $\text{H}^a$ ,  $\text{H}^b$  and  $\text{H}^c$  using online Bindfit platform.

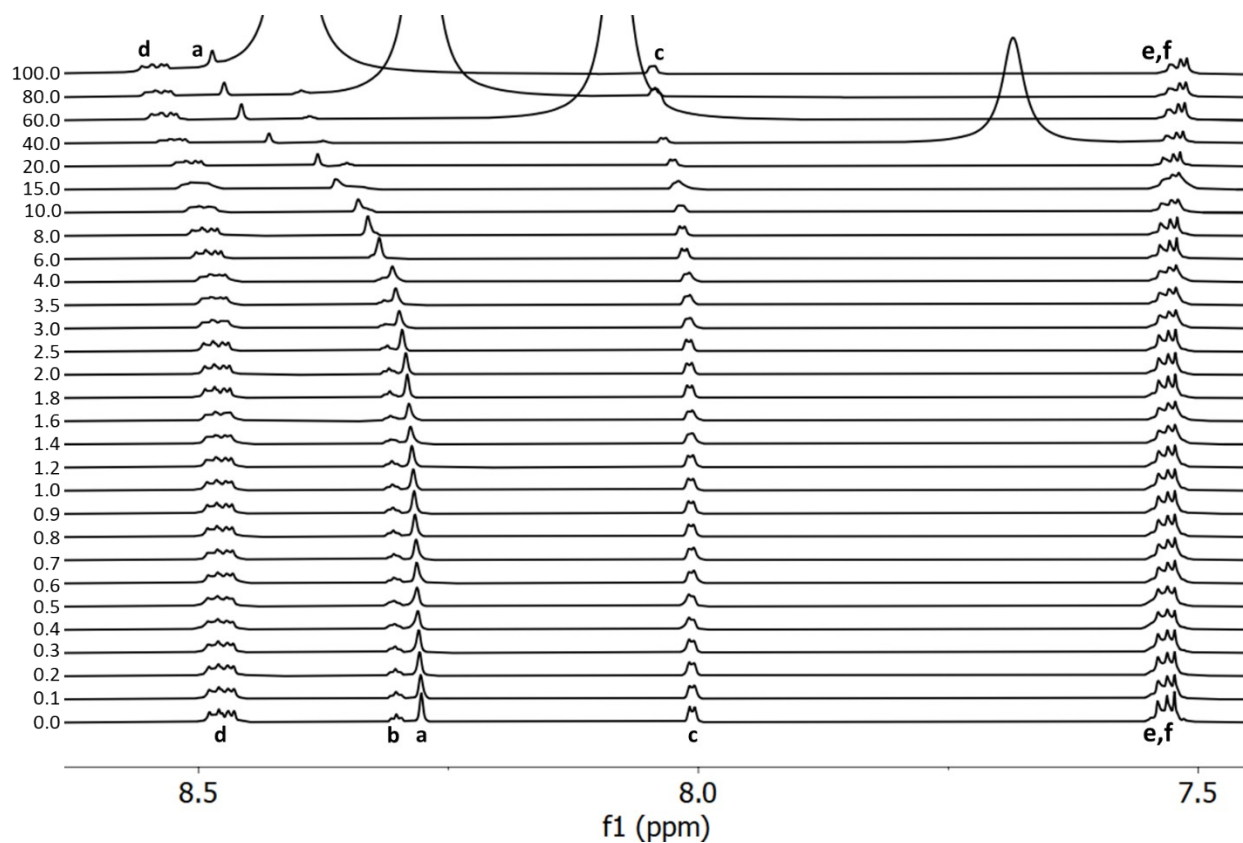

**Figure S17.**  $^1\text{H}$  NMR titration of dinitrone **8** with  $\text{TBAH}_2\text{PO}_4$  (5 mM  $\text{CD}_3\text{CN}$ , 298 K).

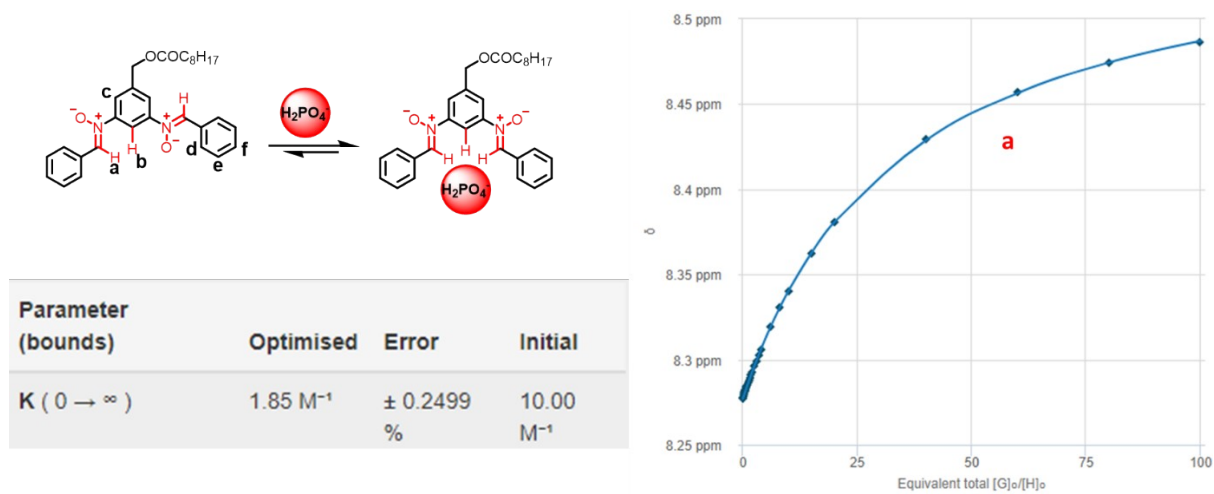

**Figure S18.** Result of data fitting of dinitrone **8** for proton  $\text{H}^a$  using online Bindfit platform.

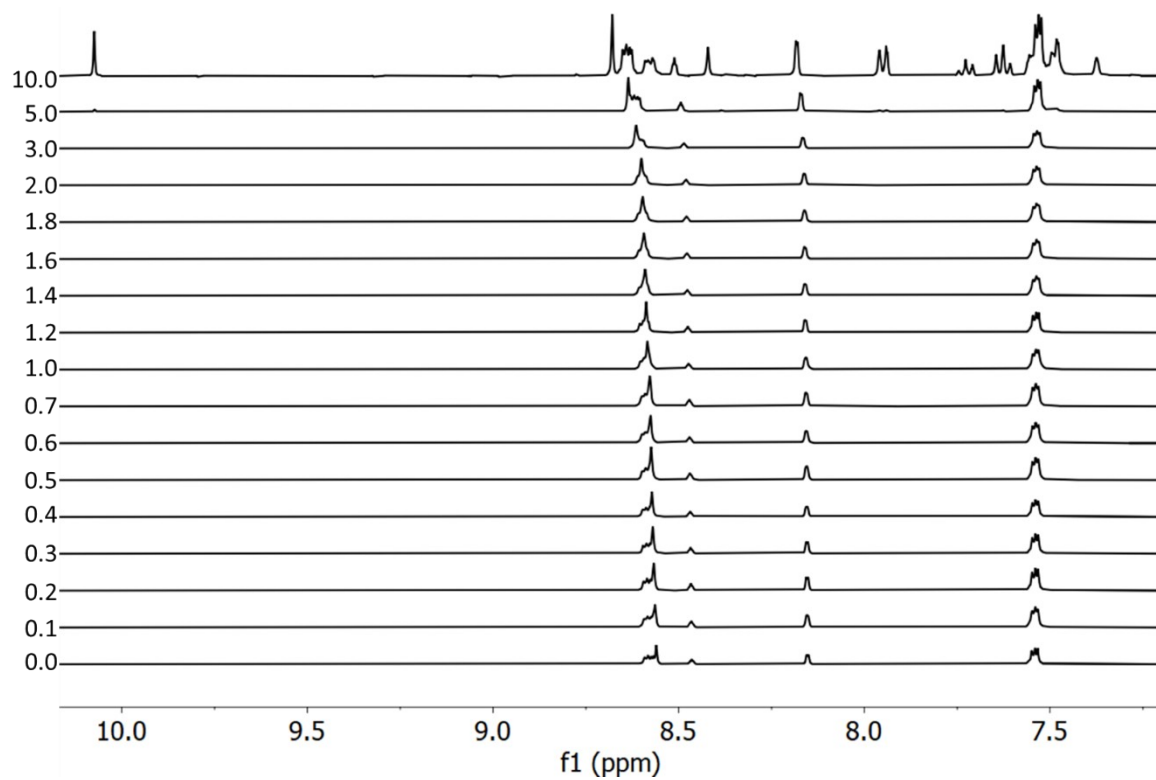

**Figure S19.** <sup>1</sup>H NMR titration of dinitrone **8** with TBAHSO<sub>4</sub> (5 mM Acetone-*d*<sub>6</sub>, 298 K). Dinitrone **8** started to decompose when 10 equiv. of TBAHSO<sub>4</sub> is added.

To compare the binding constant of dinitrone **8** with dicyanostilbene **9**, we titrated dicyanostilbene **9** with TBACl in acetone (0.6 mM in acetone- $d_6$ ) and determined its binding constant.

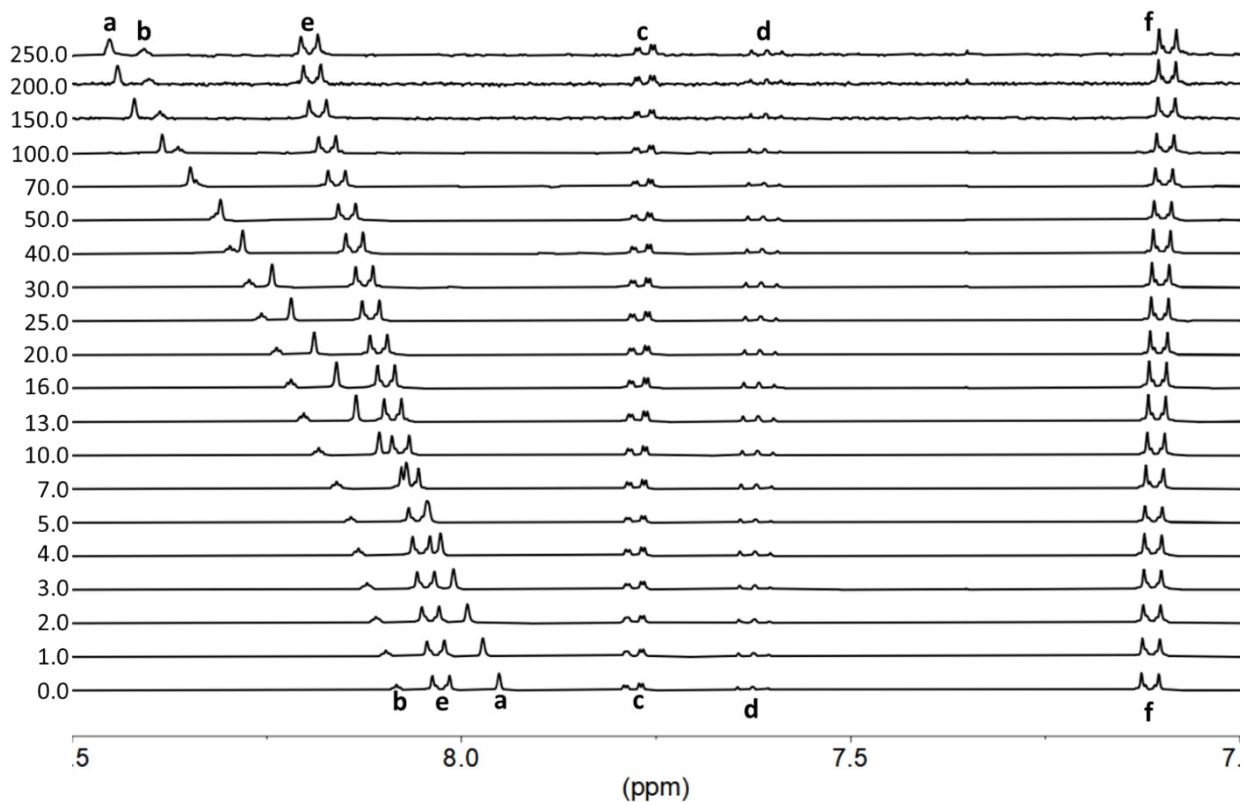

**Figure S20.**  $^1\text{H}$  NMR titration of dicyanostilbene **9** with TBACl (0.6 mM acetone- $d_6$ , 298 K).

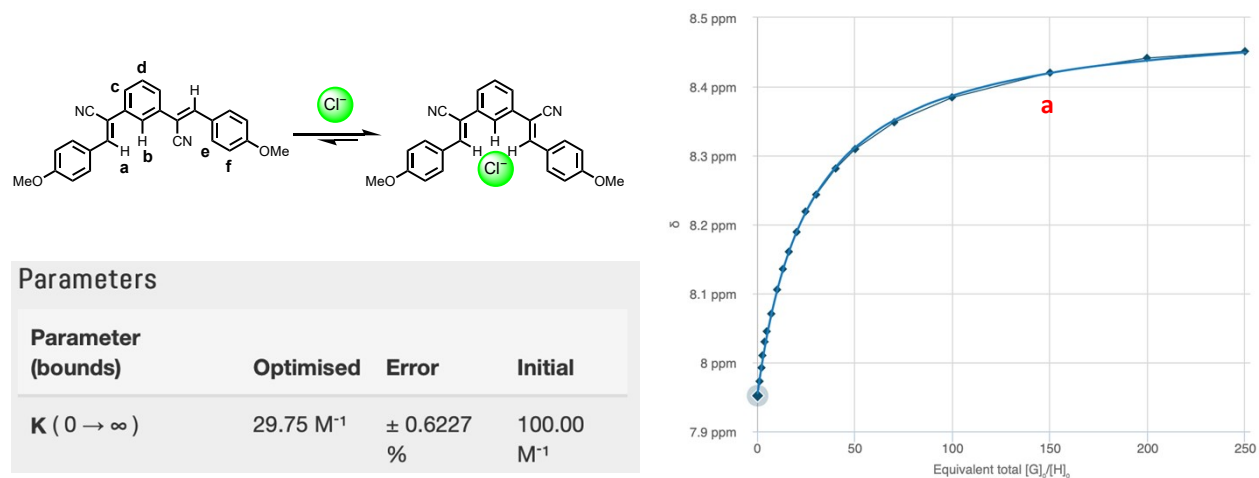

**Figure S21.** Result of data fitting of dicyanostilbene **9** for proton  $\text{H}^a$  using online Bindfit platform.



## S.5 Computational Studies of Dinitrone 3

All structures were minimized using DFT B3LYP 6-31G\* in Spartan '18 (version 1.1.0). All energies are given in kcal/mol. "Conformer Distribution" method (shown below) was used to identify viable conformations **I**, **II**, and **III**.

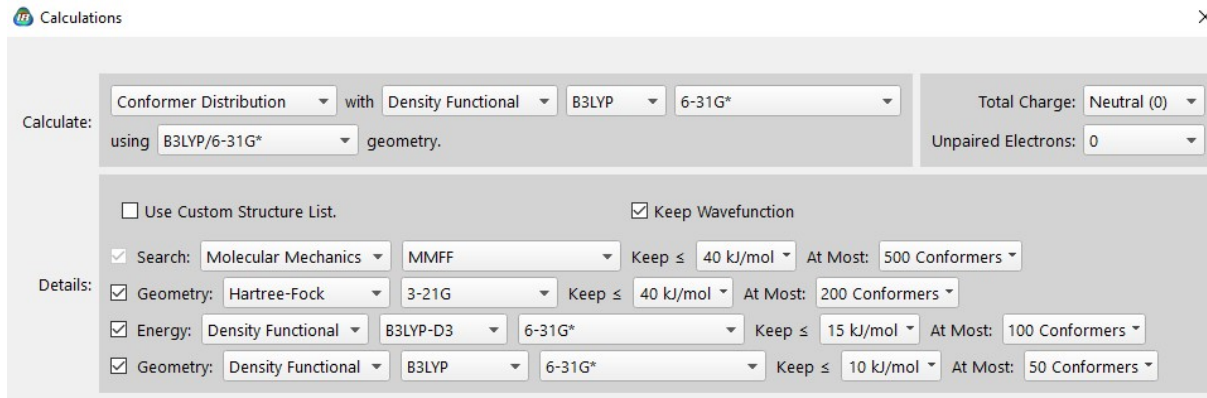

Calculations

Calculate: Conformer Distribution with Density Functional B3LYP 6-31G\* Total Charge: Neutral (0)  
using B3LYP/6-31G\* geometry. Unpaired Electrons: 0

Details:  Use Custom Structure List.  Keep Wavefunction

Search: Molecular Mechanics MMFF Keep ≤ 40 kJ/mol At Most: 500 Conformers

Geometry: Hartree-Fock 3-21G Keep ≤ 40 kJ/mol At Most: 200 Conformers

Energy: Density Functional B3LYP-D3 6-31G\* Keep ≤ 15 kJ/mol At Most: 100 Conformers

Geometry: Density Functional B3LYP 6-31G\* Keep ≤ 10 kJ/mol At Most: 50 Conformers

### Conformation I

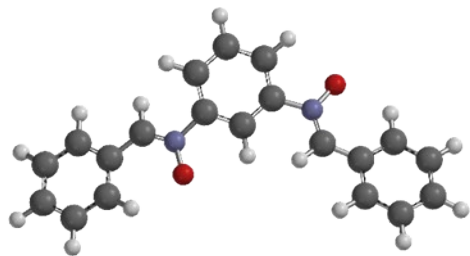

**Figure S22.** Conformation I, Energies = -647328.30 kcal/mol

|   | X        | Y         | Z         |
|---|----------|-----------|-----------|
| H | 0.906834 | -0.266087 | -4.474763 |
| C | 0.676677 | -0.287942 | -3.413677 |
| C | 0.130458 | -0.347621 | -0.674416 |
| C | 0.402469 | -1.503136 | -2.792658 |
| C | 0.673971 | 0.903339  | -2.685802 |
| C | 0.377278 | 0.861284  | -1.323378 |
| C | 0.154237 | -1.523177 | -1.418643 |
| H | 0.380938 | -2.437960 | -3.338495 |
| H | 0.922376 | 1.841117  | -3.170503 |

|   |           |           |           |
|---|-----------|-----------|-----------|
| H | -0.089921 | -0.324226 | 0.384925  |
| N | -0.118961 | -2.822715 | -0.814603 |
| C | 0.233383  | -3.044801 | 0.441315  |
| H | 0.754005  | -2.230124 | 0.925336  |
| C | 0.010192  | -4.255234 | 1.199768  |
| C | -0.330910 | -6.517943 | 2.840732  |
| C | -0.653039 | -5.402324 | 0.710227  |
| C | 0.495918  | -4.272301 | 2.526967  |
| C | 0.328551  | -5.388707 | 3.336047  |
| C | -0.817855 | -6.514411 | 1.532472  |
| H | -1.024812 | -5.396393 | -0.305211 |
| H | 1.007745  | -3.395617 | 2.916885  |
| H | 0.710017  | -5.379680 | 4.354270  |
| H | -1.331307 | -7.389622 | 1.143829  |
| H | -0.462713 | -7.392715 | 3.471906  |
| O | -0.669293 | -3.681099 | -1.592605 |
| N | 0.333897  | 2.061179  | -0.496132 |
| C | -0.089510 | 3.198570  | -1.022776 |
| H | -0.426203 | 3.131706  | -2.048828 |
| C | -0.164222 | 4.483224  | -0.363186 |
| C | -0.375545 | 7.066978  | 0.738611  |
| C | 0.222683  | 4.726635  | 0.974021  |
| C | -0.660388 | 5.562664  | -1.127478 |
| C | -0.764401 | 6.837058  | -0.584372 |
| C | 0.115874  | 6.009078  | 1.507360  |
| H | 0.600102  | 3.904379  | 1.564829  |
| H | -0.963518 | 5.389760  | -2.157220 |
| H | -1.148398 | 7.653298  | -1.191500 |

|   |           |          |          |
|---|-----------|----------|----------|
| H | 0.418759  | 6.182020 | 2.536630 |
| H | -0.457385 | 8.063044 | 1.165269 |
| O | 0.692017  | 1.898502 | 0.724844 |

Conformation II

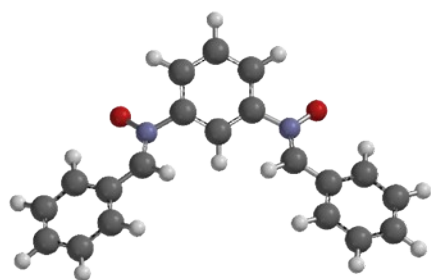

**Figure S23.** Conformation II, Energy = -647327.29 kcal/mol

|   | <b>X</b>  | <b>Y</b>  | <b>Z</b>  |
|---|-----------|-----------|-----------|
| H | -5.185922 | -0.000358 | -0.486968 |
| C | -4.117056 | -0.000181 | -0.293904 |
| C | -1.370183 | 0.000218  | 0.225339  |
| C | -3.440383 | -1.211635 | -0.166999 |
| C | -3.440485 | 1.211490  | -0.166068 |
| C | -2.067500 | 1.199699  | 0.077460  |
| C | -2.067381 | -1.199576 | 0.076769  |
| H | -3.948465 | -2.165923 | -0.232304 |
| H | -3.948720 | 2.165610  | -0.230478 |
| H | -0.326689 | 0.000651  | 0.515886  |
| N | -1.407647 | -2.490477 | 0.234398  |
| C | -0.155434 | -2.635728 | -0.170087 |
| H | 0.277967  | -1.766673 | -0.647122 |

|   |           |           |           |
|---|-----------|-----------|-----------|
| C | 0.656456  | -3.826925 | -0.058626 |
| C | 2.396255  | -6.038539 | 0.073843  |
| C | 0.233469  | -5.037262 | 0.534470  |
| C | 1.967406  | -3.756286 | -0.582926 |
| C | 2.825070  | -4.847033 | -0.519021 |
| C | 1.104311  | -6.122738 | 0.596810  |
| H | -0.769062 | -5.099500 | 0.933665  |
| H | 2.307409  | -2.830771 | -1.043055 |
| H | 3.827720  | -4.770532 | -0.930816 |
| H | 0.766178  | -7.046920 | 1.057811  |
| H | 3.064854  | -6.893546 | 0.125530  |
| O | -2.133700 | -3.418741 | 0.736778  |
| N | -1.407778 | 2.490300  | 0.236339  |
| C | -0.157267 | 2.636911  | -0.173062 |
| H | 0.274421  | 1.769032  | -0.654532 |
| C | 0.655123  | 3.827661  | -0.060778 |
| C | 2.395931  | 6.038209  | 0.074309  |
| C | 0.232005  | 5.038156  | 0.531434  |
| C | 1.966847  | 3.756055  | -0.582730 |
| C | 2.825329  | 4.846043  | -0.517149 |
| C | 1.103036  | 6.123494  | 0.594596  |
| H | -0.770760 | 5.100498  | 0.929480  |
| H | 2.307134  | 2.830035  | -1.041273 |
| H | 3.829325  | 4.768200  | -0.925856 |
| H | 0.764806  | 7.048117  | 1.055292  |
| H | 3.065037  | 6.892767  | 0.127413  |
| O | -2.131660 | 3.416197  | 0.746132  |

Conformation III

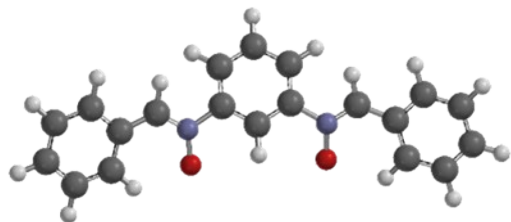

**Figure S24.** Conformation III, Energy = -647326.82 kcal/mol

|   | X         | Y         | Z         |
|---|-----------|-----------|-----------|
| H | -3.364851 | 0.000054  | -2.048724 |
| C | -2.496936 | 0.000026  | -1.396190 |
| C | -0.336144 | -0.000080 | 0.378779  |
| C | -1.957926 | 1.211555  | -0.965706 |
| C | -1.958183 | -1.211561 | -0.965405 |
| C | -0.868604 | -1.196973 | -0.090682 |
| C | -0.868330 | 1.196870  | -0.090983 |
| H | -2.410663 | 2.148169  | -1.272142 |
| H | -2.411095 | -2.148150 | -1.271656 |
| H | 0.465975  | -0.000084 | 1.104276  |
| N | -0.270025 | 2.427832  | 0.416221  |
| C | -0.222844 | 3.494765  | -0.366214 |
| H | -0.595807 | 3.344929  | -1.370473 |
| C | 0.284035  | 4.802260  | -0.014477 |
| C | 1.197796  | 7.419343  | 0.484825  |
| C | 0.806063  | 5.149952  | 1.251267  |
| C | 0.237085  | 5.794925  | -1.019635 |
| C | 0.688019  | 7.085525  | -0.773792 |
| C | 1.252174  | 6.448520  | 1.486816  |
| H | 0.849428  | 4.394193  | 2.022767  |

|   |           |           |           |
|---|-----------|-----------|-----------|
| H | -0.160611 | 5.540476  | -1.999789 |
| H | 0.642479  | 7.832773  | -1.561530 |
| H | 1.648656  | 6.702995  | 2.466239  |
| H | 1.550457  | 8.428412  | 0.680323  |
| O | 0.197534  | 2.361307  | 1.605758  |
| N | -0.270579 | -2.428000 | 0.416688  |
| C | -0.222982 | -3.494766 | -0.365912 |
| H | -0.595550 | -3.344724 | -1.370216 |
| C | 0.284045  | -4.802226 | -0.014316 |
| C | 1.198514  | -7.419024 | 0.484396  |
| C | 0.805171  | -5.150223 | 1.251656  |
| C | 0.237778  | -5.794569 | -1.019798 |
| C | 0.689004  | -7.085100 | -0.774264 |
| C | 1.251723  | -6.448657 | 1.486927  |
| H | 0.846746  | -4.395033 | 2.023897  |
| H | -0.159757 | -5.539936 | -1.999960 |
| H | 0.643651  | -7.832247 | -1.562033 |
| H | 1.646665  | -6.703898 | 2.466842  |
| H | 1.551401  | -8.428034 | 0.679748  |
| O | 0.196488  | -2.361594 | 1.606469  |

Dinitrone **3**·Cl<sup>-</sup> complex

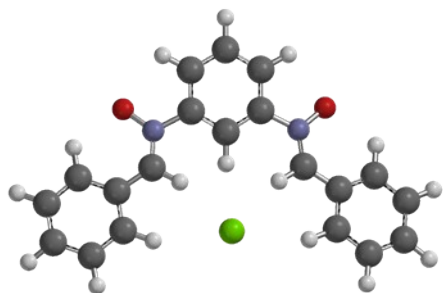

**Figure S25.** Dinitrone **3**·Cl<sup>-</sup> complex, Energy = -936176.60 kcal/mol

|   | <b>X</b>  | <b>Y</b>  | <b>Z</b>  |
|---|-----------|-----------|-----------|
| H | 5.167029  | -0.000000 | 1.097694  |
| C | 4.117983  | -0.000000 | 0.812621  |
| C | 1.418605  | 0.000000  | 0.062876  |
| C | 3.454473  | 1.210064  | 0.627866  |
| C | 3.454473  | -1.210064 | 0.627866  |
| C | 2.106333  | -1.199273 | 0.265296  |
| C | 2.106333  | 1.199274  | 0.265296  |
| H | 3.947160  | 2.167065  | 0.741252  |
| H | 3.947160  | -2.167065 | 0.741252  |
| H | 0.376036  | 0.000000  | -0.241370 |
| N | 1.474493  | 2.503752  | 0.068955  |
| C | 0.159892  | 2.613713  | 0.132158  |
| H | -0.406943 | 1.711501  | 0.353528  |
| O | 2.289840  | 3.483481  | -0.136359 |
| C | -0.602924 | 3.828131  | -0.072250 |
| C | -2.296297 | 6.047705  | -0.435324 |
| C | -0.061453 | 5.107401  | -0.329104 |
| C | -2.008846 | 3.684027  | -0.003729 |
| C | -2.840363 | 4.783968  | -0.183351 |
| C | -0.909571 | 6.199044  | -0.507358 |
| H | 1.013110  | 5.213840  | -0.382941 |
| H | -2.421886 | 2.692922  | 0.180458  |
| H | -3.918771 | 4.654044  | -0.129302 |
| H | -0.480766 | 7.179628  | -0.704430 |
| H | -2.948659 | 6.907210  | -0.575834 |
| N | 1.474493  | -2.503752 | 0.068956  |
| C | 0.159892  | -2.613713 | 0.132157  |

|    |           |           |           |
|----|-----------|-----------|-----------|
| H  | -0.406943 | -1.711501 | 0.353527  |
| O  | 2.289840  | -3.483481 | -0.136358 |
| C  | -0.602924 | -3.828131 | -0.072250 |
| C  | -2.296297 | -6.047705 | -0.435324 |
| C  | -0.061453 | -5.107401 | -0.329104 |
| C  | -2.008846 | -3.684027 | -0.003729 |
| C  | -2.840363 | -4.783969 | -0.183351 |
| C  | -0.909571 | -6.199044 | -0.507359 |
| H  | 1.013110  | -5.213840 | -0.382942 |
| H  | -2.421886 | -2.692923 | 0.180459  |
| H  | -3.918771 | -4.654044 | -0.129301 |
| H  | -0.480766 | -7.179628 | -0.704430 |
| H  | -2.948659 | -6.907210 | -0.575834 |
| Cl | -2.177298 | 0.000000  | 0.449115  |



## S.6 X-ray Crystallographic Analysis of Dinitrone 3

Single crystals suitable for X-ray crystallography were prepared by slow diffusion of *n*-pentane into a solution of **3** in acetone. The crystal was placed MiTeGen pins, coated in oil. The X-ray intensity data collection was carried out on a Bruker APEXII DUO CCD area detector using graphite-monochromated Mo-K $\alpha$  radiation ( $\lambda = 0.71073 \text{ \AA}$ ) at 90.0 K. CCDC 2201970 contain the supplementary crystallographic data for this paper.

### Crystal data of dinitrone 3

|                                |                                                          |
|--------------------------------|----------------------------------------------------------|
| $C_{20}H_{16}N_2O_2$           | $D_x = 1.397 \text{ Mg m}^{-3}$                          |
| $M_r = 316.35$                 | Mo K $\alpha$ radiation, $\lambda = 0.71073 \text{ \AA}$ |
| Tetragonal, $P4_1$             | Cell parameters from 9912 reflections                    |
| $a = 5.3375 (6) \text{ \AA}$   | $\theta = 3.1\text{--}28.1^\circ$                        |
| $c = 52.802 (9) \text{ \AA}$   | $\mu = 0.09 \text{ mm}^{-1}$                             |
| $V = 1504.3 (4) \text{ \AA}^3$ | $T = 90 \text{ K}$                                       |
| $Z = 4$                        | Triangular, colourless                                   |
| $F(000) = 664$                 | $0.33 \times 0.17 \times 0.17 \text{ mm}$                |

### Data collection

|                                                                                  |                                                                        |
|----------------------------------------------------------------------------------|------------------------------------------------------------------------|
| Bruker Kappa APEX-II DUO diffractometer                                          | 3562 independent reflections                                           |
| Radiation source: fine-focus sealed tube                                         | 3508 reflections with $I > 2\sigma(I)$                                 |
| TRIUMPH curved graphite monochromator                                            | $R_{\text{int}} = 0.062$                                               |
| $\phi$ and $\omega$ scans                                                        | $\theta_{\text{max}} = 30.2^\circ$ , $\theta_{\text{min}} = 1.2^\circ$ |
| Absorption correction: multi-scan<br><i>SADABS</i> (Krause <i>et al.</i> , 2015) | $h = -7 - 7$                                                           |
| $T_{\text{min}} = 0.921$ , $T_{\text{max}} = 0.985$                              | $k = -7 - 7$                                                           |
| 33370 measured reflections                                                       | $l = -68 - 67$                                                         |

### Refinement

|                                 |                                                          |
|---------------------------------|----------------------------------------------------------|
| Refinement on $F^2$             | Hydrogen site location: inferred from neighbouring sites |
| Least-squares matrix: full      | H-atom parameters constrained                            |
| $R[F^2 > 2\sigma(F^2)] = 0.048$ | $w = 1/[\sigma^2(F_o^2) + (0.038P)^2 + 1.4807P]$         |

|                   |                                                                                                                                                        |
|-------------------|--------------------------------------------------------------------------------------------------------------------------------------------------------|
|                   | where $P = (F_o^2 + 2F_c^2)/3$                                                                                                                         |
| $wR(F^2) = 0.119$ | $(\Delta/\sigma)_{\max} < 0.001$                                                                                                                       |
| $S = 1.16$        | $\Delta\rho_{\max} = 0.34 \text{ e } \text{\AA}^{-3}$                                                                                                  |
| 3562 reflections  | $\Delta\rho_{\min} = -0.41 \text{ e } \text{\AA}^{-3}$                                                                                                 |
| 218 parameters    | Absolute structure: Flack x determined using 1632 quotients $[(I^+)-(I^-)]/[(I^+)+(I^-)]$ (Parsons, Flack and Wagner, Acta Cryst. B69 (2013) 249-259). |
| 1 restraint       | Absolute structure parameter: 0.2 (4)                                                                                                                  |

*Refinement.* Refined as a 2-component twin.

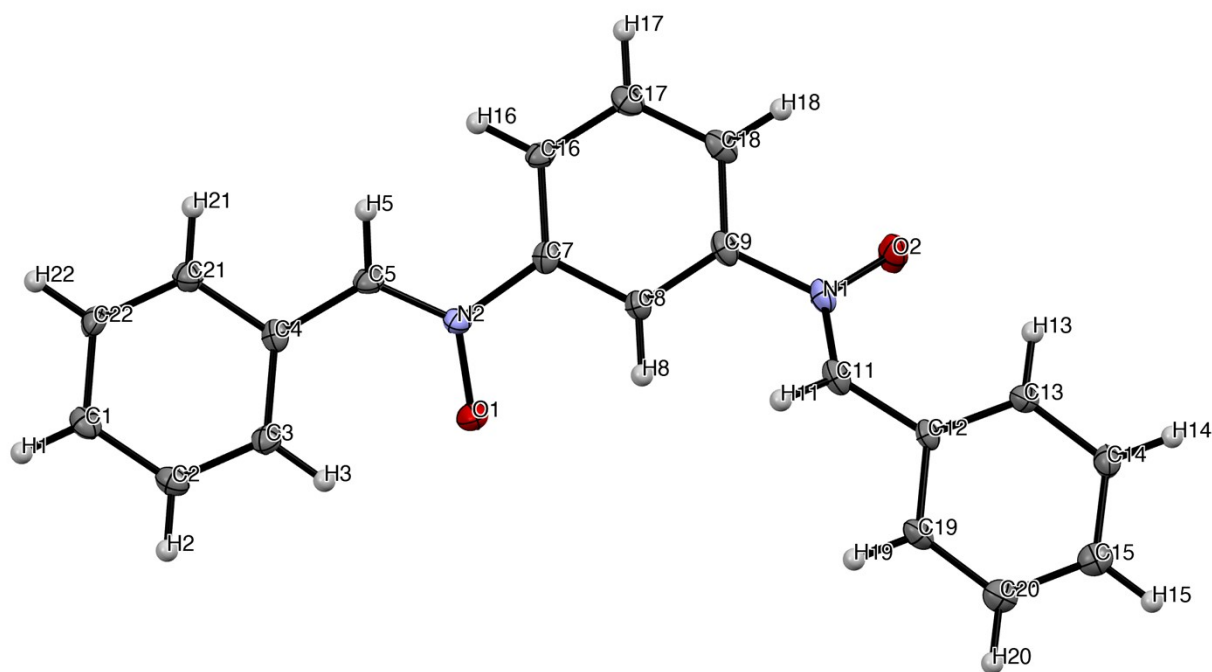

**Figure S26.** X-ray crystal structure of dinitrone **3**. Thermal ellipsoids at the 50% probability level.

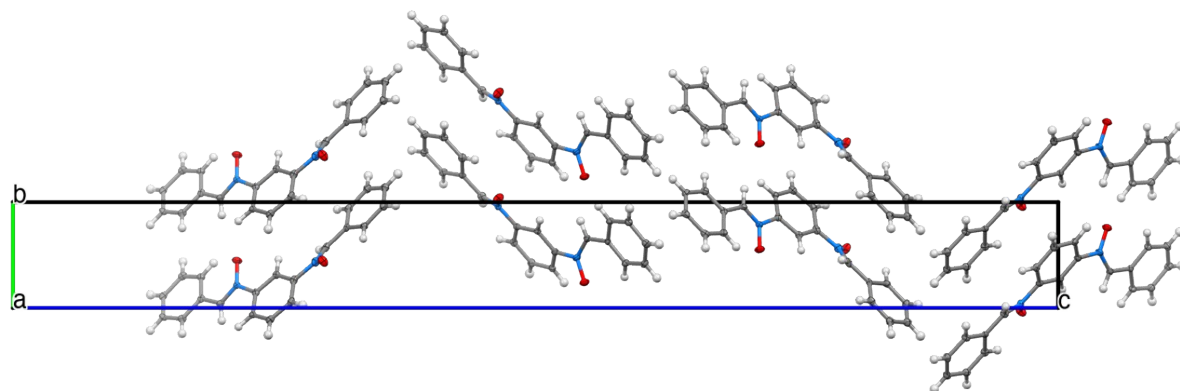

*Fi*

*Figure S27.* Packing structure of **3** viewed along the a-axis.

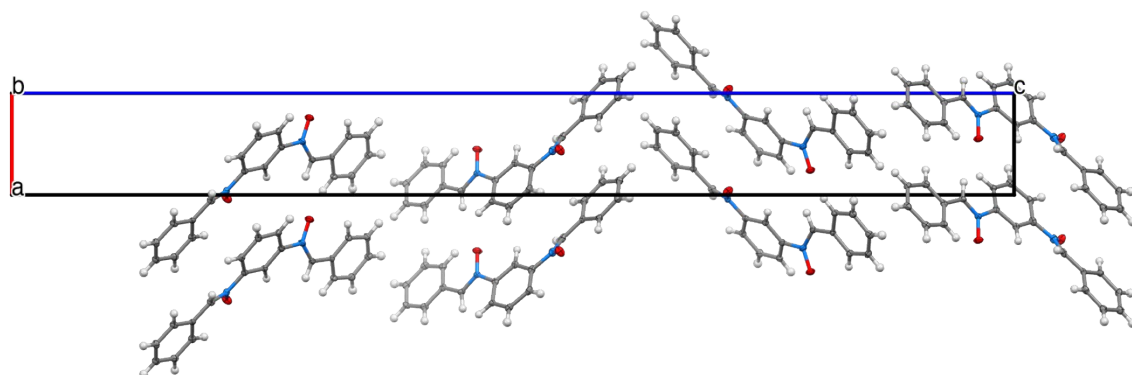

*Figure S28.* Packing structure of **3** viewed along the b-axis.

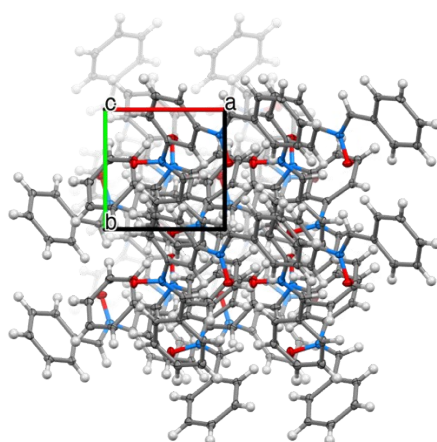

*Figure S29.* Packing structure of **3** viewed along the c-axis.

## S.6 References

1. Ichikawa, S.; Zhu, S.; Buchwald, S. L. A Modified System for the Synthesis of Enantioenriched N-Arylamines through Copper-Catalyzed Hydroamination. *Angew. Chem. Int. Ed.* **2018**, *57*, 8714-8718.
2. Campbell, R. F.; Fitzpatrick, K.; Inghardt, T.; Karlsson, O.; Nilsson, K.; Reilly, J. E.; Yet, L. *Tetrahedron Lett.* **2003**, *44*, 5477-5481.
3. Lee, S.; Chen, C.-H.; Flood, A. H. *Nat. Chem.* **2013**, *5*, 704-710.
